# Supplementary material for: Multidrug-Resistant Helicobacter pylori Strains: A Five-Year Surveillance Study and Its Genome Characteristics
Source: MDPI journal article supplement (doi:10.3390/antibiotics11101391), 2022-10-11
Supplement: s1 [file s1]

Table S1: Quality of genome sequencing

| <b>Assembly</b>                 | <b>HP18045</b> | <b>HP21041</b> |
|---------------------------------|----------------|----------------|
| # contigs ( $\geq 0$ bp)        | 34             | 41             |
| # contigs ( $\geq 1000$ bp)     | 30             | 38             |
| # contigs ( $\geq 5000$ bp)     | 21             | 26             |
| # contigs ( $\geq 10000$ bp)    | 18             | 22             |
| # contigs ( $\geq 25000$ bp)    | 16             | 20             |
| # contigs ( $\geq 50000$ bp)    | 12             | 11             |
| Total length ( $\geq 0$ bp)     | 1631102        | 1614323        |
| Total length ( $\geq 1000$ bp)  | 1628188        | 1612108        |
| Total length ( $\geq 5000$ bp)  | 1606665        | 1579305        |
| Total length ( $\geq 10000$ bp) | 1584197        | 1544131        |
| Total length ( $\geq 25000$ bp) | 1548405        | 1507772        |
| Total length ( $\geq 50000$ bp) | 1410211        | 1172137        |
| # contigs                       | 34             | 41             |
| Largest contig                  | 309238         | 176430         |
| Total length                    | 1631102        | 1614323        |
| GC (%)                          | 38.81          | 39.21          |
| N50                             | 133035         | 93545          |
| N75                             | 69574          | 47309          |
| L50                             | 4              | 7              |
| L75                             | 9              | 12             |
| # N's per 100 kbp               | 0              | 0              |

Table S2: List of antibiotic resistance genes predicted to occur in HP18045 using RGI bioinformatic tool.

| Best Hit ARO                                                                           | Best Identities | ARO     | Model_type            | SNPs in Best Hit ARO | Other SNPs | Antibiotic Class                       | Resistance Mechanism                                        | AMR Gene Family                                                                       |
|----------------------------------------------------------------------------------------|-----------------|---------|-----------------------|----------------------|------------|----------------------------------------|-------------------------------------------------------------|---------------------------------------------------------------------------------------|
| <i>vanT</i> gene in <i>vanG</i> cluster                                                | 33.24           | 3002972 | protein homolog model | n/a                  | n/a        | glycopeptide                           | antibiotic target alteration                                | glycopeptide resistance gene cluster; <i>vanT</i>                                     |
| <i>Helicobacter pylori</i> <i>pbp2</i> mutants conferring resistance to amoxicillin    | 98.3            | 3007058 | protein variant model | S494H, E572G         | n/a        | cephalosporin; cephamycin; carbapenems | antibiotic target alteration                                | Penicillin-binding protein mutations conferring resistance to beta-lactam antibiotics |
| <i>Helicobacter pylori</i> <i>rpoB</i> mutation conferring resistance to rifampicin    | 99.1            | 3007051 | protein variant model | I837V, K2068R        | n/a        | fluoroquinolone; rifamycin             | antibiotic target alteration; antibiotic target replacement | rifamycin-resistant beta-subunit of RNA polymerase ( <i>rpoB</i> )                    |
| <i>Helicobacter pylori</i> <i>frxA</i> mutation conferring resistance to metronidazole | 100             | 3007059 | protein variant model | Y62D                 | n/a        | nitroimidazole                         | antibiotic target alteration                                | Antibiotic resistant <i>Helicobacter pylori</i> nitroreductase                        |

|                                                                                           |       |         |                         |                         |     |                                        |                              |                                                                                       |
|-------------------------------------------------------------------------------------------|-------|---------|-------------------------|-------------------------|-----|----------------------------------------|------------------------------|---------------------------------------------------------------------------------------|
| <i>Helicobacter pylori</i> <i>pbp1</i> mutants conferring resistance to amoxicillin       | 97.42 | 3007060 | protein variant model   | V374L, S595G            | n/a | cephalosporin; cephamycin; carbapenems | antibiotic target alteration | Penicillin-binding protein mutations conferring resistance to beta-lactam antibiotics |
| <i>Helicobacter pylori</i> <i>rdxA</i> mutation conferring resistance to metronidazole    | 94.76 | 3007055 | protein variant model   | R90K, A118S, C49T, D59N | n/a | nitroimidazole                         | antibiotic target alteration | Antibiotic resistant <i>Helicobacter pylori</i> nitroreductase                        |
| <i>Helicobacter pylori</i> 23S rRNA with mutation conferring resistance to clarithromycin | 99.26 | 3004134 | rRNA gene variant model | C1707T, A2144G          | n/a | macrolide                              | antibiotic target alteration | 23S rRNA with mutation conferring resistance to macrolide antibiotics                 |

ARO:antibiotic resistance orthologue; SNP: single nucleotide polymorphism; AMR: antimicrobial resistance

Table S3: List of antibiotic resistance genes predicted to occur in HP21041 using RGI bioinformatic tool.

| Best Hit ARO                                                                 | Best Identities | ARO     | Model type            | SNPs in Best Hit ARO | Other SNPs | Antibiotic Class                        | Resistance Mechanism         | AMR Gene Family                                                                       |
|------------------------------------------------------------------------------|-----------------|---------|-----------------------|----------------------|------------|-----------------------------------------|------------------------------|---------------------------------------------------------------------------------------|
| <i>vanTr</i> gene in <i>vanL</i> cluster                                     | 35.99           | 3002974 | protein homolog model | n/a                  | n/a        | glycopeptide                            | antibiotic target alteration | glycopeptide resistance gene cluster; <i>vanT</i>                                     |
| <i>Helicobacter pylori pbp2</i> mutants conferring resistance to amoxicillin | 96.94           | 3007058 | protein variant model | S494H, E572G         | n/a        | cephalosporin; cephameycin; carbapenems | antibiotic target alteration | Penicillin-binding protein mutations conferring resistance to beta-lactam antibiotics |
| <i>Helicobacter pylori pbp1</i> mutants conferring resistance to amoxicillin | 96.51           | 3007060 | protein variant model | T593A, G595S         | n/a        | cephalosporin; cephameycin; carbapenems | antibiotic target alteration | Penicillin-binding protein mutations conferring resistance to beta-lactam antibiotics |
| <i>Helicobacter pylori gyrA</i> conferring resistance to fluoroquinolones    | 95.65           | 3007052 | protein variant model | T87I, N87I           | n/a        | fluoroquinolone                         | antibiotic target alteration | fluoroquinolone resistant <i>gyrA</i>                                                 |

|                                                                                           |       |             |                         |                        |     |                             |                                                             |                                                                       |
|-------------------------------------------------------------------------------------------|-------|-------------|-------------------------|------------------------|-----|-----------------------------|-------------------------------------------------------------|-----------------------------------------------------------------------|
| <i>Helicobacter pylori rpoB</i> mutation conferring resistance to rifampicin              | 98.65 | 300705<br>1 | protein variant model   | K2068R, Q2079K         | n/a | fluoroquinolone ; rifamycin | antibiotic target alteration; antibiotic target replacement | rifamycin-resistant beta-subunit of RNA polymerase ( <i>rpoB</i> )    |
| <i>Helicobacter pylori</i> 23S rRNA with mutation conferring resistance to clarithromycin | 99.13 | 300413<br>4 | rRNA gene variant model | A2147G, C1707T, A2144G | n/a | macrolide                   | antibiotic target alteration                                | 23S rRNA with mutation conferring resistance to macrolide antibiotics |

ARO:antibiotic resistance orthologue; SNP: single nucleotide polymorphism; AMR: antimicrobial resistance.

**Figure S1: Distribution of minimum inhibitory concentration (MIC) of the tested antibiotics**

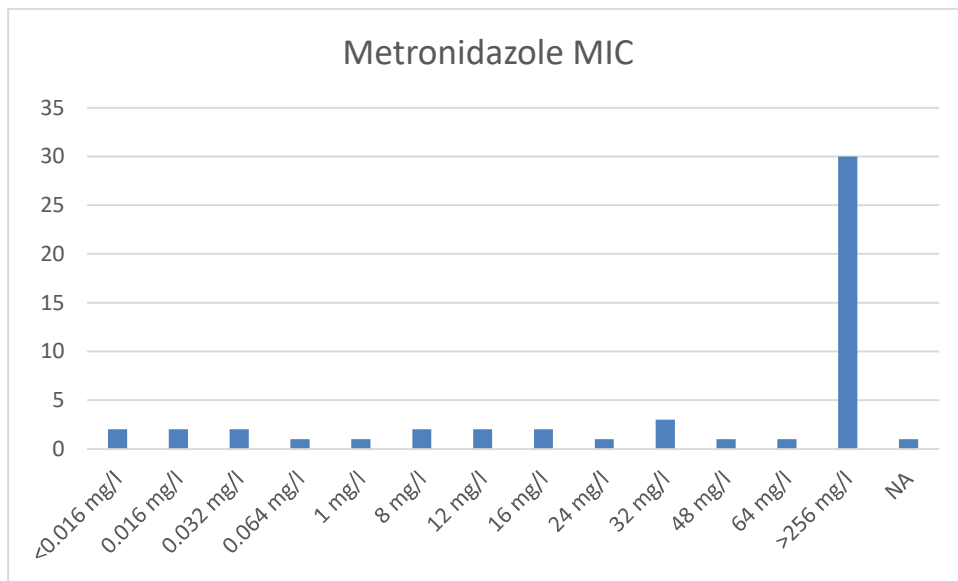

Figure S1a: Distribution of MIC in metronidazole. x-axis is MIC value while y-axis is number of *H. pylori* isolates

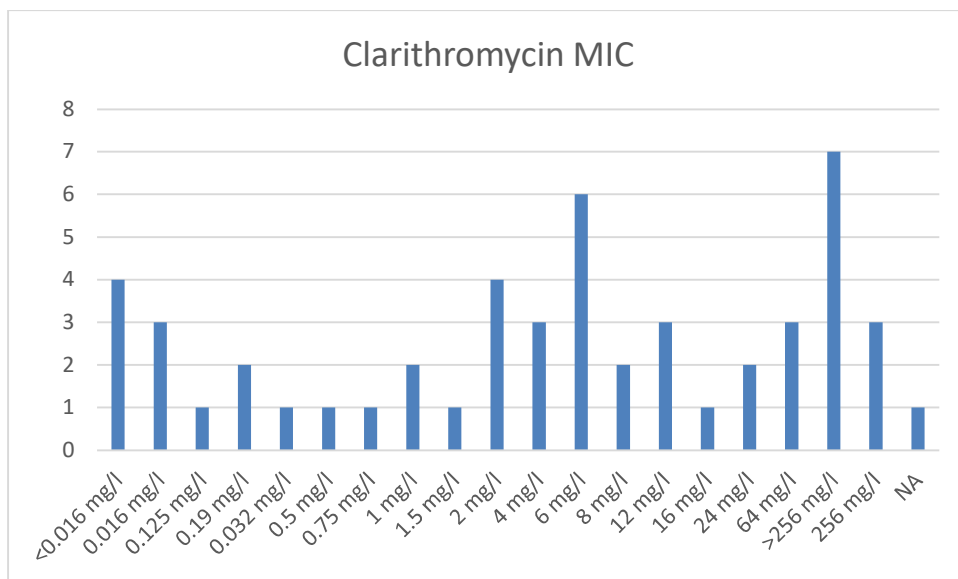

Figure S1b: Distribution of MIC in clarithromycin. x-axis is MIC value while y-axis is number of *H. pylori* isolates

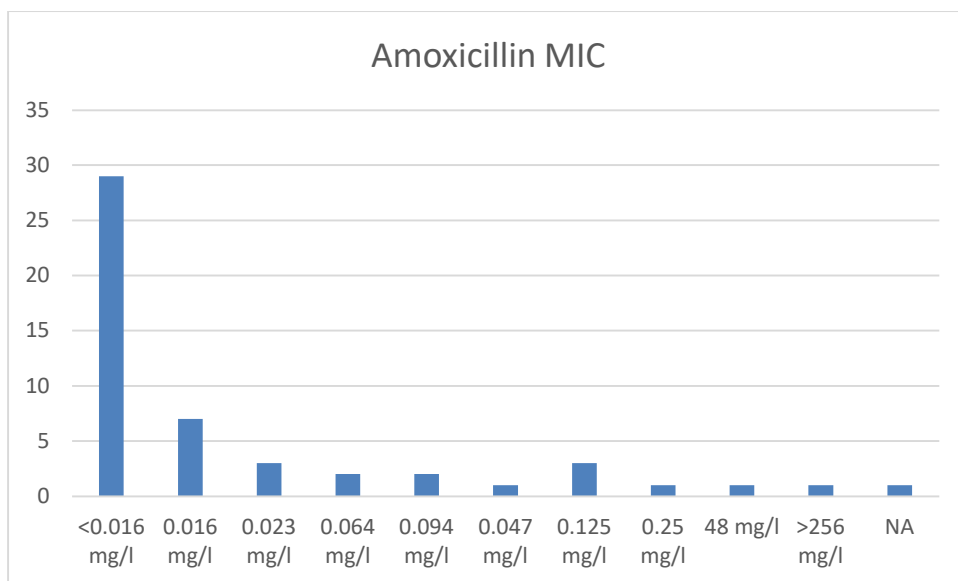

Figure S1c: Distribution of MIC in amoxicillin. x-axis is MIC value while y-axis is number of *H. pylori* isolates

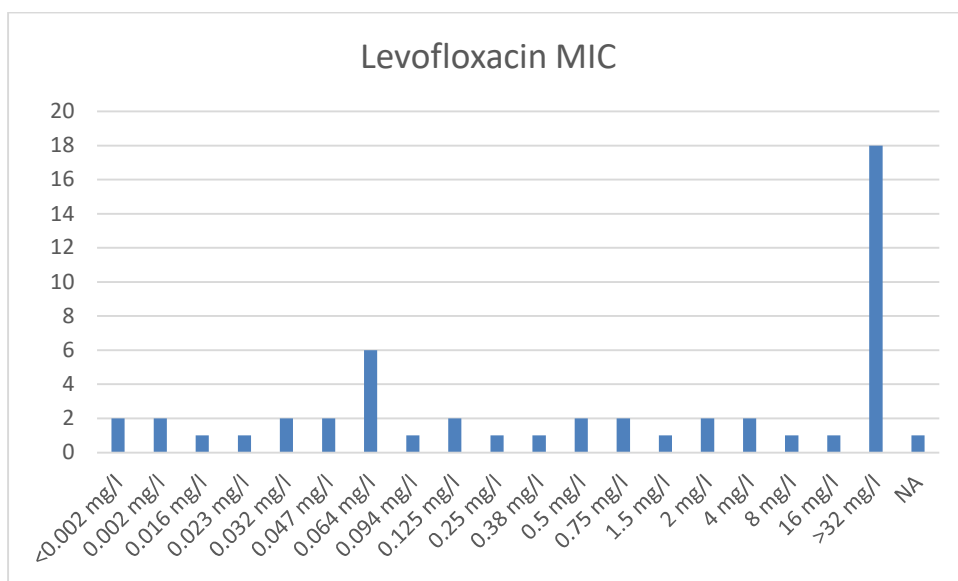

Figure S1d: Distribution of MIC in levofloxacin. x-axis is MIC value while y-axis is number of *H. pylori* isolates
